# Supplementary material for: Ceramic Manufacturing and Development of Social Complexity in the Neolithic Linfen Basin, China
Source: Research Square preprint supplement (doi:10.21203/rs.3.rs-7231729/v1), 2025-08-21
Supplement: Supplementary file 1 [file 2aeaf469a6a9fe1f5582c35e.xlsx]

## Sheet: Sheet1
Group	Sample	S	V	Cr	Zn	Rb	Sr
ZC	ZC1-1	349.711	119.869	88.6285	146.928	105.171	233.5
ZC	ZC2-1	434.402	107.638	70.1089	130.197	136.544	181.783
ZC	ZC5-1	773.113	83.0909	70.2123	82.4619	131.371	278.926
XM	XM1-1	215.825	97.3351	89.4211	123.348	101.15	131.525
XM	XM2-1	514.627	94.237	77.6937	93.5602	163.564	142.904
XM	XM5-1	256.722	76.0093	62.0473	180.036	155.905	400.435
ZZ	ZZ1-1	368.52	99.4169	77.8788	116.401	122.745	200.272
ZZ	ZZ2-1	908.317	128.751	77.3423	157.742	142.176	479.899
DD	DD1-1	136.732	98.4516	70.9982	93.9756	131.423	175.28
DD	DD2-1	134.806	92.746	74.2977	76.8408	126.721	128.343
DD	DD3-1	677.339	68.9268	52.5929	67.1044	139.855	148.399
DD	DD4-1	231.832	113.966	101.999	119.352	117.71	173.504
YM	YM1-1	401.096	115.978	86.6553	138.257	155.068	176.329
YM	YM2-1	250.227	95.8207	75.0183	117.128	132.573	153.25
YM	TM3-1	237.875	115.148	95.6332	128.474	155.535	111.243
NC	NC1-1	456.465	152.799	109.222	109.922	119.715	393.695
NC	NC2-1	389.036	127.939	100.284	85.8094	186.614	220.057
NC	NC3-1	453.154	107.297	87.9473	124.026	111.594	509.957
NC	NC4-1	308.086	117.763	115.455	204.634	133.596	210.587
CT	CT1-1	413.982	108.352	80.9896	124.281	109.009	283.088
CT	CT4-1	646.634	101.908	74.276	105.092	106.167	505.378
CT	CT5-2	399.211	86.0734	79.5789	82.7348	111.573	175.998
BX	BX1-1	441.382	104.691	85.3708	83.908	124.858	185.224
BX	BX2-1	572.084	99.4454	78.6905	100.696	138.838	166.674
BX	BX3-1	508.476	99.9674	74.6088	105.685	135.711	311.987
LB	LB1-1	453.938	115.993	96.862	85.906	157.799	133.029
LB	LB2-1	620.477	101.28	100.306	82.7338	133.166	164.196
LB	LB3-1	589.463	102.916	90.2471	86.3229	134.431	136.201
LB	LB5-1	666.519	106.319	79.9228	90.2737	134.537	282.084
FC	FC1-1	471.775	76.3945	60.2597	72.5901	126.13	170.512
FC	FC3-1	285.8	70.2004	55.4413	70.2543	89.0674	201.303
FC	FC4-1	599.461	102.709	75.0695	89.0175	171.287	301.41
FC	FC5-1	697.289	80.6621	67.6415	77.625	118.127	172.405
TC	TC1-1	529.4	123.281	85.662	98.5794	136.083	219.766
TC	TC2-1	411.927	145.484	100.494	151.022	186.988	345.671
TC	TC3-1	478.536	129.859	95.016	95.8663	128.752	382.693
TC	TC4-1	929.012	149.091	114.618	134.904	185.229	355.231
TC	TC5-1	499.408	101.009	78.5314	76.2251	132.788	228.072
TS	TS1-1	294.338	122.118	86.359	174.788	127.877	154.833
TS	TS3-1	764.876	103.517	79.1381	100.957	135.594	201.228
TS	TS6-1	390.699	128.274	89.136	105.411	148.372	166.846
TS	TS8-1	187.698	1.05521	2.31801	9.98034	268.337	1098.52
TS	TS9-1	210.729	106.669	86.618	185.829	103.766	169.297
TS	TS10-1	619.312	106.894	88.0407	85.2423	136.567	253.728
TS	TS11-1	375.414	125.742	72.6725	89.2041	150.737	258.201
TS	TS12-1	516.777	117.168	90.3456	102.97	148.895	240.095
