# Supplementary material for: Ceramic Manufacturing and Development of Social Complexity in the Neolithic Linfen Basin, China
Source: Research Square preprint supplement (doi:10.21203/rs.3.rs-7231729/v1), 2025-08-21
Supplement: Supplementary file 2 [file 70549689cc1bd4e255c83a1d.xlsx]

## Sheet: Sheet1
		Na2O	MgO	Al2O3	SiO2	K2O	CaO	TiO2	FeO
		wt%	wt%	wt%	wt%	wt%	wt%	wt%	wt%
ZC1-1（张篡）	fuzao stoves	1.3	2.6	16.8	66	2.7	2.4	0.9	6.3
ZC1-2（张篡）	li tripods	0.8	2.1	16.2	69.2	3.8	0.7	0.6	5.5
ZC1-3（张篡）	sherd	2.3	1.8	17.4	67.9	2.7	1.6	0.3	4.8
ZC1-4（张篡）	sherd	1.2	2.2	16.3	66.5	2.4	1.8	0.8	5.4
ZC1-5（张篡）	ring-footed guan jars	0.4	2.6	17.3	67.4	2.7	2.3	0.9	3.9
ZC1-6（张篡）	fuzao stoves	1.2	2.1	16.8	63.5	2.6	2.1	0.5	4.5
ZC1-7（张篡）	fuzao stoves	1.3	1.7	16.4	64.5	2.1	1.7	0.4	4.7
ZC1-8（张篡）	li tripods	1.1	1.5	16.3	66.3	2.7	1.5	0.7	3.5
ZC1-9（张篡）	ring-footed guan jars	2.2	1.4	16.4	65.4	2.4	1.8	0.6	5.4
ZC1-10（张篡）	small-mouthed shouldered guan jars	0.9	2.5	17.5	65.5	2.3	1.5	0.5	5.3
XM1-1（新民）	fuzao stoves	1	1.4	14.8	71.2	2.7	1.4	1.4	4.9
XM1-2（新民）	fuzao stoves	1.1	2	17.1	67.5	4.4	0.9	0.3	5.5
XM1-3（新民）	sherd	1.7	1.5	17	68.8	3.9	1.1	0.6	4.4
XM1-4（新民）	sherd	1.3	2.1	15.2	67.5	3.5	2.1	1.1	5.4
XM1-5（新民）	flat-based hu bottles	2.3	1.7	16.4	68.4	2.8	0.9	0.6	5.6
XM1-6（新民）	small-mouthed shouldered guan jars	2.2	2.2	16.7	66.3	2.9	1.2	0.3	4.3
XM1-7（新民）	li tripods	1.8	1.8	17.5	65.4	2.5	1.5	0.1	4.6
XM1-8（新民）	sherd	1.9	2.6	16.4	67.3	2.8	1.4	1.1	4.3
XM1-9（新民）	sherd	0.9	2.8	17.3	65.3	2.7	2.1	1.3	5.6
XM1-10（新民）	sherd	1.1	2.5	16.5	66.2	4.2	2	1.2	5.7
ZZ1-1（周庄）	fuzao stoves	1.3	2.6	16.3	68.3	2.4	1.8	0.6	5.7
ZZ1-2（周庄）	fuzao stoves	0.7	2.4	16.1	63.7	3.6	4.5	0.5	7.3
ZZ1-3（周庄）	sherd	2.3	2.6	16.2	64.5	3.7	1.6	0.4	6.1
ZZ1-4（周庄）	sherd	2.1	2.5	17.4	64.3	3.8	1.8	0.6	5.3
ZZ1-5（周庄）	sherd	1.9	1.9	18.2	64.5	3.9	1.5	0.3	5.8
ZZ1-6（周庄）	sherd	1.7	1.6	16.5	64.2	2.6	1.7	1.1	5.9
ZZ1-7（周庄）	sherd	0.7	2.3	16.6	66.7	3.8	1.9	0.9	4.6
ZZ1-8（周庄）	sherd	0.9	1.9	16.9	66.4	3.6	2	0.7	4.8
ZZ1-9（周庄）	sherd	2.2	2.6	16.5	66.2	3.7	2.1	0.8	5.2
ZZ1-10（周庄）	sherd	1.6	1.7	16.6	66.8	3.6	2.2	1	5.1
DD1-1（东段）	small-mouthed shouldered guan jars	1.1	1.6	16.3	69.9	3.5	0.8	0.5	5.1
DD1-2（东段）	small-mouthed shouldered guan jars	2.8	1.9	18.4	67.3	2.8	0.5	0.4	5
DD1-3（东段）	li tripods	3.1	1.9	16.8	66.2	3.4	3.6	0.3	3.8
DD1-4（东段）	ring-footed guan jars	1.4	1.9	16.7	67.5	2.6	2.3	0.5	5.6
DD1-5（东段）	sherd	1.5	2.6	17.5	67.4	2.7	1.4	0.2	4.6
DD1-6（东段）	sherd	1.7	1.7	16.4	66.3	2.6	1.7	0.4	4.3
DD1-7（东段）	sherd	2.4	2.6	17.3	66.3	2.9	1.5	0.3	4.4
DD1-8（东段）	sherd	2.3	2.8	16.7	67.3	3.1	1.4	0.2	4.8
DD1-9（东段）	sherd	1.5	2.5	16.4	67.4	3.5	1.8	0.5	5.2
DD1-10（东段）	flat-based hu bottles	1.6	1.9	18.5	65.2	3.4	2.1	0.3	5.3
YM1-1（义门）	li tripods	0.6	4.1	21.4	56	3.5	5.5	0.7	6.9
YM1-2（义门）	small-mouthed shouldered guan jars	1.3	2.5	16.7	67.1	3.5	1.7	0.5	5.8
YM1-3（义门）	ring-footed guan jars	1.1	2.1	16.4	69.6	2.8	0.7	0.5	5.8
YM1-4（义门）	fuzao stoves	0.9	2.4	16.8	68.3	2.6	1.4	0.5	5.9
YM1-5（义门）	li tripods	1.8	2.4	16.8	63.2	2.4	1.6	0.6	6.2
YM1-6（义门）	sherd	1.7	2.7	17.3	62.5	2.6	1.5	0.3	5.4
YM1-7（义门）	sherd	2.1	2.8	18.6	65.3	3.5	1.3	0.7	6.1
YM1-8（义门）	sherd	0.6	2.1	16.5	67.8	3.2	1.4	0.8	6.2
NC1-1（南柴）	fuzao stoves	0.6	3.8	18.5	56	2.8	9.4	0.7	6.8
NC1-2（南柴）	fuzao stoves	0.7	1.5	24.3	62	4.5	0.8	0.7	4.5
NC1-3（南柴）	li tripods	0.8	3.4	16.8	55	2.7	13.5	0.7	5.7
NC1-4（南柴）	fuzao stoves	1.3	2.8	17.3	63.9	3.1	3.2	0.8	6.5
NC1-5（南柴）	li tripods	1.2	1.6	17.7	59.4	2.7	3.2	1	6.4
NC1-6（南柴）	ring-footed guan jars	1.1	1.7	16.5	60.2	2.9	3.4	0.7	5.3
CY1-1（朝阳）	fuzao stoves	0.6	1.5	18.9	66.5	2.8	1.8	0.5	5.9
CY1-2（朝阳）	sherd	1.4	2.5	20.5	60.3	4.2	3.2	0.5	6.2
CY1-3（朝阳）	sherd	1.2	2.7	15.1	70.9	2.3	1.5	0.4	4.9
CY1-4（朝阳）	li tripods	1.3	2.5	16.7	67.4	3.2	2.5	0.6	5
CY1-5（朝阳）	li tripods	1.5	1.8	16.9	66.3	3.1	2.6	0.2	5.4
CY1-6（朝阳）	li tripods	2.1	1.9	17.1	67.3	2.7	1.4	0.3	6.2
BX1-1（北席）	li tripods	1.3	2	15.3	69.3	3.5	1.5	0.8	5.2
BX1-2（北席）	flat-based hu bottles	1.6	2.2	17.4	66.8	3.2	1.6	0.4	5.8
BX1-3（北席）	flat-based hu bottles	1.6	1.9	16.3	66.3	2.6	1.7	1.1	5.9
BX1-4（北席）	fuzao stoves	0.9	1.5	16.5	66.3	2.8	1.8	0.8	6.1
BX1-5（北席）	li tripods	2.3	2.3	16.6	66.3	3.1	2.3	0.9	5.7
BX1-6（北席）	small-mouthed shouldered guan jars	1.1	2.5	16.8	67.3	2.7	2.1	1.2	5.3
BX1-7（北席）	small-mouthed shouldered guan jars	1.4	2.1	16.5	66.8	2.6	2	1.4	6.3
BX1-8（北席）	flat-based hu bottles	1.2	2.5	15.5	67.5	3.2	1.7	1.3	6.2
LB1-1（令伯）	flat-based hu bottles	1.2	2.2	17.9	67.4	3.4	0.6	0.6	5.8
LB1-2（令伯）	small-mouthed shouldered guan jars	1.1	2.5	15.3	67.8	2.9	3.7	0.6	5.2
LB1-3（令伯）	li tripods	2.3	2	17.1	66.6	3.3	1.2	0.4	6
LB1-4（令伯）	li tripods	1.2	2.7	15.8	64.2	2.8	5.9	0.4	5.8
LB1-5（令伯）	ring-footed guan jars	1.1	2.3	16.7	65.4	3.1	2.4	0.7	5.7
LB1-6（令伯）	ring-footed guan jars	0.9	1.9	14.5	65.7	2.6	2.3	0.8	5.2
LB1-7（令伯）	fuzao stoves	0.8	2.3	16.5	63.4	2.8	2.1	1	5.4
LB1-8（令伯）	sherd	1.2	2.8	15.5	65.2	2.7	1.5	0.7	6.3
LB1-9（令伯）	sherd	1.3	1.8	17.6	66.3	2.1	3.2	0.4	5.2
LB1-10（令伯）	sherd	1.6	1.9	15.5	67.3	2.6	2.1	0.2	5.8
FC1-1（方城）	ring-footed guan jars	1.9	1.9	14.2	70	3.1	3.4	0.3	4.3
FC1-2（方城）	li tripods	3.6	1.8	17.7	65.6	2	4.1	0.3	4
FC1-3（方城）	small-mouthed shouldered guan jars	1.3	2.3	17.4	64	4.5	3	0.7	5.4
FC1-4（方城）	li tripods	0.9	2.4	12.3	71.4	2.3	4.8	0.3	4.6
FC1-5（方城）	flat-based hu bottles	1.1	2	17.7	69.8	2.6	3.3	0.7	5.2
FC1-6（方城）	sherd	0.9	1.4	16.5	65.3	2.7	2.5	0.8	5.3
FC1-7（方城）	sherd	0.8	2.4	16.7	68.3	2.8	2.3	0.6	4.5
FC1-8（方城）	sherd	0.9	2.9	15.8	68.9	2.5	2.1	0.7	4.6
FC1-9（方城）	sherd	2.3	1.5	16.7	64.2	2.4	2	0.6	4.8
TC1-1（听城）	small-mouthed shouldered guan jars	1.1	2.7	16.4	64.9	3.1	3.5	0.7	6.5
TC1-2（听城）	small-mouthed shouldered guan jars	1.3	2.9	18.2	56.6	3.8	6.9	1.7	6.9
TC1-3（听城）	li tripods	1.3	2.1	15.5	68	2.7	2.8	0.7	5.8
TC1-4（听城）	li tripods	1	3.7	19.2	54.5	3.8	6.9	0.7	8.2
TC1-5（听城）	fuzao stoves	0.8	2.3	14.9	69.6	2.9	3	0.3	5.2
TC1-6（听城）	sherd	0.8	2.2	14.7	58.6	2.8	0.4	0.5	5.2
TC1-7（听城）	flat-based hu bottles	1.3	0.8	15.8	59.4	4.2	1.8	0.3	6.7
TC1-8（听城）	sherd	1.2	1.4	16.4	66.7	3.1	1.9	0.4	6.2
TC1-9（听城）	sherd	1	1.7	16.3	62.4	3.6	2.4	0.5	6.1
TC1-10（听城）	sherd	1.7	2.2	17.5	63.2	3.2	3.2	0.6	5.8
TS1-1（陶寺）	fuzao stoves	0.3	1.8	21	62.7	3.1	1.6	0.6	7.7
TS1-2（陶寺）	sherd	1	2.6	16.2	62.7	2.7	5.7	0.6	6.6
TS1-3（陶寺）	flat-based hu bottles	0.7	1.7	18.2	67.3	3.4	0.7	0.5	6.4
TS1-4（陶寺）	li tripods	3.9	0.1	18.8	64.9	10.3	0.4	0.1	3.2
TS1-5（陶寺）	sherd	1	2.2	15.8	70.3	2.7	0.8	0.5	5.8
TS1-6（陶寺）	fuzao stoves	1.7	2.4	18.8	63.8	4.1	1.9	0.6	5.4
TS1-7（陶寺）	sherd	0.9	2	17.9	65.5	3.5	2.4	0.4	6.3
TS1-8（陶寺）	li tripods	2.1	2.3	18.9	63.2	3.7	0.8	1.1	6.5
TS1-9（陶寺）	small-mouthed shouldered guan jars	0.9	2.2	17.4	62.1	4.2	2.1	1	4.6
TS1-10（陶寺）	small-mouthed shouldered guan jars	1.1	1.9	18.4	65.4	3.6	2.7	1.2	4.3
TS1-11（陶寺）	flat-based hu bottles	0.9	0.5	16.4	67.2	3.7	3.2	0.6	4.6
TS1-12（陶寺）	li tripods	2.5	2.3	16.3	61.3	2.5	2.3	0.5	6.3
